# Supplementary material
Source: HighWire-hosted journal article supplement (https://bmjopen.bmj.com/content/15/3/e086150)
Supplement: inline-supplementary-material-1 [file inline-supplementary-material-1.pdf]

Appendix

|                                                          | Page(s) |
|----------------------------------------------------------|---------|
| 1. Model parameters – health utility                     | 2       |
| 2. Number of patients in each age group                  | 3       |
| 3. Matching process                                      | 4       |
| 4. Subgroup characteristics pre and post matching:       |         |
| aged 60 years and younger                                | 5       |
| aged 61-75 years                                         | 6       |
| aged > 75 years                                          | 7       |
| 5. Model parameters for revision and reoperation:        |         |
| aged 60 years and younger                                | 8       |
| aged 61-75 years                                         | 9       |
| aged > 75 years                                          | 10      |
| 6. Cost-effectiveness acceptability curve in men         | 11      |
| 7. Cost estimations:                                     |         |
| Implant costs                                            | 12      |
| Difference in duration of operating time                 | 12      |
| Total difference in mean cost                            | 13      |
| Overall cost estimations                                 | 13      |
| 8. Change in costs and QALYs by age for the young cohort | 14      |
| 9. CHEERS 2022 Checklist                                 | 15-17   |
| 10. References                                           | 18      |

Model parameters – health utility

| Prosthesis | Procedure         | EQ-5D-5L | Standard deviation |
|------------|-------------------|----------|--------------------|
| TSA        | Pre-operative     | 0.34     |                    |
|            | Success Primary   | 0.76     | 0.18               |
|            | Success Revision  | 0.61     | 0.18               |
|            | Recovery Primary  | 0.66     | 0.18               |
|            | Recovery Revision | 0.54     | 0.18               |
|            | Re-revision       | 0.54     | 0.18               |
|            | Pre-operative     | 0.34     | 0.18               |
| Hemi       | Pre-operative     | 0.35     |                    |
|            | Success Primary   | 0.64     | 0.22               |
|            | Success Revision  | 0.61     | 0.22               |
|            | Recovery Primary  | 0.58     | 0.22               |
|            | Recovery Revision | 0.54     | 0.22               |
|            | Re-revision       | 0.54     | 0.18               |
|            | Pre-operative     | 0.35     | 0.18               |

Table 1. EQ-5D-5L utility scores.

Number of shoulders arthroplasties in each age group

| Age group     | Pre-matching |      | Post-matching |      |
|---------------|--------------|------|---------------|------|
|               | TSA          | HA   | TSA           | HA   |
| ≤ 60 years    | 1471         | 746  | 1177          | 623  |
| 61 – 75 years | 6002         | 2010 | 3714          | 1889 |
| > 75 years    | 3008         | 1461 | 2323          | 1236 |

Table 2. Number of shoulder arthroplasties in each age group.

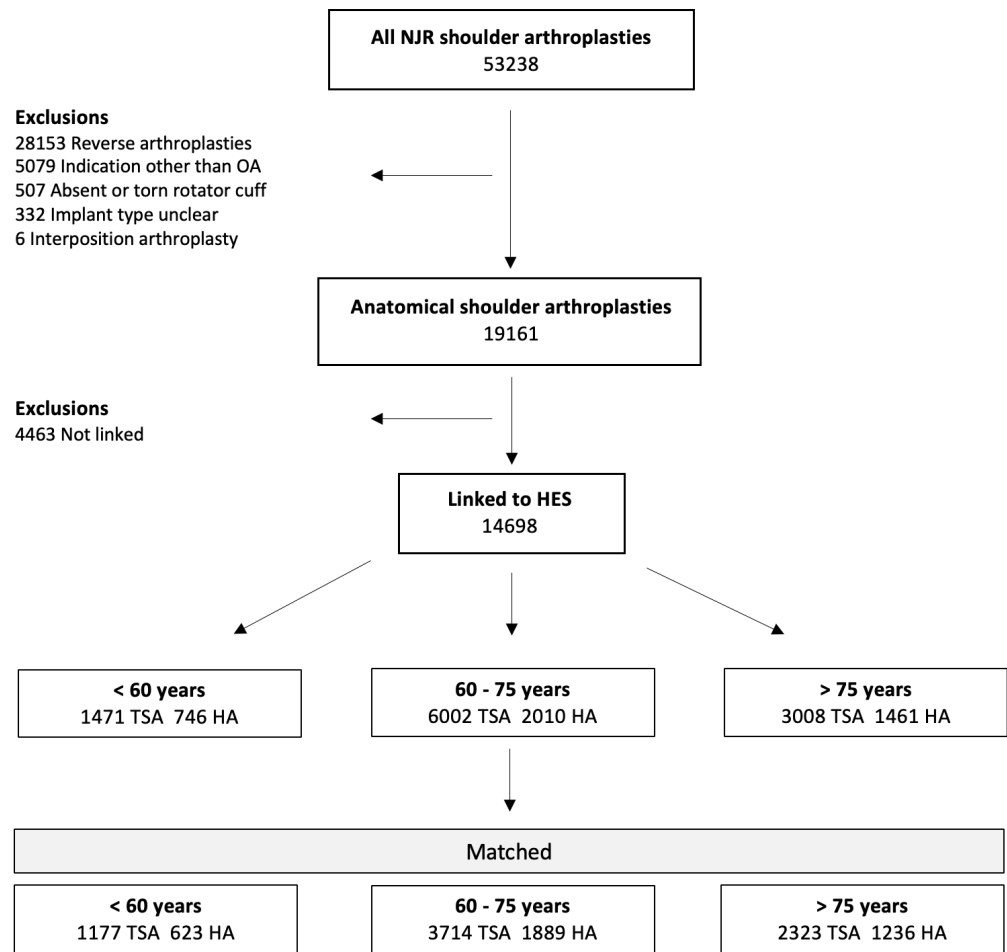

Figure 1. Study flow diagram. Adapted with consent from Davies et al (1).

## Matching process

Components of the matching process were varied to achieve the optimal match as defined by the lowest standardised mean difference (SMD) between each variable pre- and post-matching. The lowest SMDs were achieved when patients were matched on the linear predictor (log odds of the propensity score) using a ratio of 1 HA to 2 TSA, greedy matching without replacement and a calliper width of 0.2.

### Characteristics pre and post matching – subgroup aged 60 years or less

| Characteristic                              | Pre-matching |            |       | Post-matching |            |       |
|---------------------------------------------|--------------|------------|-------|---------------|------------|-------|
|                                             | TSA          | HA         | SMD   | TSA           | HA         | SMD   |
| <b>Age (mean, SD)</b>                       | 54.5 (5.4)   | 52.0 (7.4) | 0.382 | 53.8 (5.7)    | 53.6 (5.7) | 0.042 |
| <b>Gender (number, %)</b>                   |              |            |       |               |            |       |
| Male                                        | 767 (52.1)   | 481 (64.5) | 0.252 | 681 (57.9)    | 382 (61.3) | 0.071 |
| Female                                      | 704 (47.9)   | 265 (35.5) |       | 496 (42.1)    | 241 (38.7) |       |
| <b>ASA (number, %)</b>                      |              |            |       |               |            |       |
| I                                           | 283 (19.2)   | 203 (27.2) | 0.197 | 248 (21.1)    | 144 (23.1) | 0.054 |
| II                                          | 950 (64.6)   | 422 (56.6) |       | 724 (61.5)    | 377 (60.5) |       |
| III                                         | 230 (15.6)   | 118 (15.8) |       | 200 (17.0)    | 99 (15.9)  |       |
| IV                                          | 8 (0.5)      | 3 (0.4)    |       | 5 (0.4)       | 3 (0.5)    |       |
| <b>Rotator cuff (number, %)</b>             |              |            |       |               |            |       |
| Attenuated/normal                           | 1460 (99.3)  | 730 (97.9) | 0.117 | 1166 (99.1)   | 617 (99.0) | 0.003 |
| Repaired                                    | 11 (0.7)     | 16 (2.1)   |       | 11 (0.9)      | 6 (1.0)    |       |
| <b>Operating surgeon (number, %)</b>        |              |            |       |               |            |       |
| Consultant                                  | 1369 (93.1)  | 704 (94.4) | 0.168 | 1117 (94.9)   | 593 (95.2) | 0.016 |
| SpR/ST3-ST8                                 | 46 (3.1)     | 30 (4.0)   |       | 39 (3.3)      | 20 (3.2)   |       |
| Speciality doctor                           | 31 (2.1)     | 4 (0.5)    |       | 8 (0.7)       | 4 (0.6)    |       |
| F1-ST2                                      | 0 (0.0)      | 1 (0.1)    |       | 0 (0.0)       | 0 (0.0)    |       |
| Other                                       | 25 (1.7)     | 7 (0.9)    |       | 13 (1.1)      | 6 (1.0)    |       |
| <b>Surgical assistant (number, %)</b>       |              |            |       |               |            |       |
| Consultant                                  | 121 (8.2)    | 59 (7.9)   | 0.012 | 95 (8.1)      | 45 (7.2)   | 0.032 |
| Other                                       | 1350 (91.8)  | 687 (92.1) |       | 1082 (91.9)   | 578 (92.8) |       |
| <b>Surgical approach (number, %)</b>        |              |            |       |               |            |       |
| Deltopectoral                               | 1369 (93.1)  | 704 (94.4) | 0.213 | 1096 (93.1)   | 573 (92.0) | 0.071 |
| Deltoid detachment                          | 4 (0.3)      | 1 (0.1)    |       | 1 (0.1)       | 1 (0.2)    |       |
| Other                                       | 2 (0.1)      | 0 (0.0)    |       | 0 (0.0)       | 0 (0.0)    |       |
| Posterior                                   | 3 (0.2)      | 2 (0.3)    |       | 3 (0.3)       | 2 (0.3)    |       |
| Superior (Mackenzie)                        | 69 (4.7)     | 63 (8.4)   |       | 66 (5.6)      | 40 (6.4)   |       |
| Trans-deltoid                               | 24 (1.6)     | 13 (1.7)   |       | 11 (0.9)      | 7 (1.1)    |       |
| <b>Unit type (number, %)</b>                |              |            |       |               |            |       |
| NHS                                         | 1440 (97.9)  | 735 (98.5) | 0.048 | 1159 (98.5)   | 613 (98.4) | 0.006 |
| Independent                                 | 31 (2.1)     | 11 (1.5)   |       | 18 (1.5)      | 10 (1.6)   |       |
| <b>Cases / yr (mean, SD)</b>                | 9.3 (5.5)    | 8.2 (4.9)  | 0.198 | 8.5 (5.0)     | 8.4 (5.0)  | 0.033 |
| <b>Charlson Comorbidity Index(mean, SD)</b> | 0.8 (1.3)    | 0.8 (1.3)  | 0.006 | 0.8 (1.3)     | 0.8 (1.3)  | 0.025 |
| <b>Deprivation level (number, %)</b>        |              |            |       |               |            |       |
| Least deprived                              | 314 (21.6)   | 180 (24.3) | 0.080 | 268 (22.8)    | 149 (23.9) | 0.032 |
| Less deprived                               | 401 (27.6)   | 185 (25.0) |       | 314 (26.7)    | 160 (25.7) |       |
| More deprived                               | 391 (26.9)   | 205 (27.7) |       | 323 (27.4)    | 172 (27.6) |       |
| Most deprived                               | 349 (24.0)   | 170 (23.0) |       | 272 (23.1)    | 142 (22.8) |       |

Table 3. Characteristics pre- and post-matching, patients age 60 years or less.

## Characteristics pre and post matching – subgroup aged 61-75 years

| Characteristic                               | Pre-matching |             |       | Post-matching |             |       |
|----------------------------------------------|--------------|-------------|-------|---------------|-------------|-------|
|                                              | TSA          | HA          | SMD   | TSA           | HA          | SMD   |
| <b>Age (mean, SD)</b>                        | 69.0 (4.0)   | 69.0 (4.1)  | 0.003 | 69.0 (4.1)    | 68.9 (4.1)  | 0.013 |
| <b>Gender (number, %)</b>                    |              |             |       |               |             |       |
| Male                                         | 1913 (31.9)  | 692 (34.4)  | 0.054 | 1262 (34.0)   | 652 (34.5)  | 0.011 |
| Female                                       | 4089 (68.1)  | 1318 (65.6) |       | 2452 (66.0)   | 1237 (65.5) |       |
| <b>ASA (number, %)</b>                       |              |             |       |               |             |       |
| I                                            | 480 (8.0)    | 170 (8.5)   | 0.077 | 313 (8.4)     | 157 (8.3)   | 0.019 |
| II                                           | 4252 (70.8)  | 1369 (68.1) |       | 2526 (68.0)   | 1290 (68.3) |       |
| III                                          | 1259 (21.0)  | 461 (22.9)  |       | 865 (23.3)    | 435 (23.0)  |       |
| IV                                           | 11 (0.2)     | 10 (0.5)    |       | 10 (0.3)      | 7 (0.4)     |       |
| <b>Rotator cuff (number, %)</b>              |              |             |       |               |             |       |
| Attenuated/normal                            | 5945 (99.1)  | 1961 (97.6) | 0.116 | 3660 (98.5)   | 1865 (98.7) | 0.016 |
| Repaired                                     | 57 (1.5)     | 49 (2.4)    |       | 54 (1.5)      | 24 (1.3)    |       |
| <b>Operating surgeon (number, %)</b>         |              |             |       |               |             |       |
| Consultant                                   | 5465 (91.1)  | 1838 (91.4) | 0.077 | 3404 (91.7)   | 1735 (91.8) | 0.009 |
| SpR/ST3-ST8                                  | 120 (2.0)    | 23 (1.1)    |       | 205 (5.5)     | 101 (5.3)   |       |
| Speciality doctor                            | 289 (4.8)    | 111 (5.5)   |       | 60 (1.6)      | 31 (1.6)    |       |
| Other                                        | 128 (2.1)    | 38 (1.9)    |       | 45 (1.2)      | 22 (1.2)    |       |
| <b>Surgical assistant (number, %)</b>        |              |             |       |               |             |       |
| Consultant                                   | 540 (9.0)    | 192 (9.6)   | 0.019 | 377 (9.1)     | 177 (9.4)   | 0.010 |
| Other                                        | 5462 (91.0)  | 1818 (90.4) |       | 3377 (90.9)   | 1712 (90.6) |       |
| <b>Surgical approach (number, %)</b>         |              |             |       |               |             |       |
| Deltpectoral                                 | 5569 (92.8)  | 1771 (88.1) | 0.189 | 3379 (91.0)   | 1733 (91.7) | 0.045 |
| Deltoid detachment                           | 9 (0.1)      | 3 (0.1)     |       | 7 (0.2)       | 3 (0.2)     |       |
| Other                                        | 12 (0.2)     | 4 (0.2)     |       | 7 (0.2)       | 4 (0.2)     |       |
| Posterior                                    | 10 (0.2)     | 6 (0.3)     |       | 8 (0.2)       | 5 (0.3)     |       |
| Superior (Mackenzie)                         | 283 (4.7)    | 180 (9.0)   |       | 246 (6.6)     | 108 (5.7)   |       |
| Trans-deltoid                                | 119 (2.0)    | 46 (2.3)    |       | 67 (1.8)      | 36 (1.9)    |       |
| <b>Unit type (number, %)</b>                 |              |             |       |               |             |       |
| NHS                                          | 5901 (98.3)  | 1985 (98.8) | 0.037 | 3669 (98.8)   | 1864 (98.7) | 0.010 |
| Independent                                  | 101 (1.7)    | 25 (1.2)    |       | 45 (1.2)      | 25 (1.3)    |       |
| <b>Cases / yr (mean, SD)</b>                 | 9.8 (5.6)    | 8.2 (5.3)   | 0.304 | 8.5 (5.1)     | 8.2 (5.1)   | 0.060 |
| <b>Charlson Comorbidity Index (mean, SD)</b> | 1.1 (1.6)    | 1.1 (1.5)   | 0.001 | 1.1 (1.5)     | 1.1 (1.5)   | 0.009 |
| <b>Deprivation level (number, %)</b>         |              |             |       |               |             |       |
| Least deprived                               | 1655 (28.0)  | 611 (30.5)  | 0.073 | 1114 (30.0)   | 581 (30.8)  | 0.022 |
| Less deprived                                | 1945 (32.9)  | 598 (29.9)  |       | 1096 (29.5)   | 560 (29.6)  |       |
| More deprived                                | 1417 (24.0)  | 483 (24.1)  |       | 917 (24.7)    | 451 (23.9)  |       |
| Most deprived                                | 887 (15.0)   | 311 (15.5)  |       | 587 (15.8)    | 297 (15.7)  |       |

Table 4. Characteristics pre- and post-matching, patients age 61-75 years.

### Characteristics pre and post matching – subgroup aged > 75 years

| Characteristic                               | Pre-matching |             |       | Post-matching |             |       |
|----------------------------------------------|--------------|-------------|-------|---------------|-------------|-------|
|                                              | TSA          | HA          | SMD   | TSA           | HA          | SMD   |
| <b>Age (mean, SD)</b>                        | 80.1 (3.5)   | 80.9 (3.9)  | 0.221 | 80.4 (3.6)    | 80.4 (3.6)  | 0.016 |
| <b>Gender (number, %)</b>                    |              |             |       |               |             |       |
| Male                                         | 584 (19.4)   | 236 (16.2)  | 0.085 | 410 (17.6)    | 220 (17.8)  | 0.004 |
| Female                                       | 2424 (80.6)  | 1225 (83.8) |       | 1913 (82.4)   | 1016 (82.2) |       |
| <b>ASA (number, %)</b>                       |              |             |       |               |             |       |
| I                                            | 120 (4.0)    | 70 (4.8)    | 0.092 | 103 (4.4)     | 57 (4.6)    | 0.019 |
| II                                           | 2013 (66.9)  | 914 (62.6)  |       | 1492 (64.2)   | 797 (64.5)  |       |
| III                                          | 854 (28.4)   | 466 (31.9)  |       | 712 (30.7)    | 372 (30.1)  |       |
| IV                                           | 21 (0.7)     | 11 (0.8)    |       | 16 (0.7)      | 10 (0.8)    |       |
| <b>Rotator cuff (number, %)</b>              |              |             |       |               |             |       |
| Attenuated/normal                            | 2966 (98.6)  | 1429 (97.8) | 0.060 | 2284 (98.3)   | 1216 (98.4) | 0.005 |
| Repaired                                     | 42 (1.4)     | 32 (2.2)    |       | 39 (1.7)      | 20 (1.6)    |       |
| <b>Operating surgeon (number, %)</b>         |              |             |       |               |             |       |
| Consultant                                   | 2666 (88.6)  | 1308 (89.5) | 0.163 | 2076 (89.4)   | 1118 (90.5) | 0.069 |
| SpR/ST3-ST8                                  | 71 (2.4)     | 11 (0.8)    |       | 133 (5.7)     | 74 (6.0)    |       |
| Speciality doctor                            | 154 (5.1)    | 102 (7.0)   |       | 82 (3.5)      | 33 (2.7)    |       |
| Other                                        | 117 (3.9)    | 40 (2.7)    |       | 32 (1.4)      | 11 (0.9)    |       |
| <b>Surgical assistant (number, %)</b>        |              |             |       |               |             |       |
| Consultant                                   | 288 (9.6)    | 162 (11.1)  | 0.050 | 232 (10.0)    | 123 (10.0)  | 0.001 |
| Other                                        | 2720 (90.4)  | 1299 (88.9) |       | 2091 (90.0)   | 1113 (90.0) |       |
| <b>Surgical approach (number, %)</b>         |              |             |       |               |             |       |
| Deltpectoral                                 | 2757 (91.7)  | 1323 (90.6) | 0.176 | 2135 (91.9)   | 1141 (92.3) | 0.071 |
| Deltoid detachment                           | 4 (0.1)      | 2 (0.1)     |       | 3 (0.1)       | 2 (0.2)     |       |
| Other                                        | 1 (0.0)      | 2 (0.2)     |       | 1 (0.0)       | 2 (0.2)     |       |
| Posterior                                    | 4 (0.1)      | 8 (0.5)     |       | 4 (0.2)       | 1 (0.1)     |       |
| Superior (Mackenzie)                         | 153 (5.1)    | 104 (7.1)   |       | 134 (5.8)     | 70 (5.7)    |       |
| Trans-deltoid                                | 89 (3.0)     | 22 (1.5)    |       | 46 (2.0)      | 20 (1.6)    |       |
| <b>Unit type (number, %)</b>                 |              |             |       |               |             |       |
| NHS                                          | 2953 (98.2)  | 1435 (98.2) | 0.004 | 2283 (98.3)   | 1215 (98.3) | 0.002 |
| Independent                                  | 55 (1.8)     | 26 (1.8)    |       | 40 (1.7)      | 21 (1.7)    |       |
| <b>Cases / yr (mean, SD)</b>                 | 10.7 (5.9)   | 8.6 (5.8)   | 0.364 | 9.5 (5.4)     | 9.2 (6.0)   | 0.066 |
| <b>Charlson Comorbidity Index (mean, SD)</b> | 1.4 (1.8)    | 1.4 (1.8)   | 0.018 | 1.4 (1.7)     | 1.4 (1.7)   | 0.013 |
| <b>Deprivation level (number, %)</b>         |              |             |       |               |             |       |
| Least deprived                               | 990 (33.4)   | 491 (33.7)  | 0.079 | 799 (34.4)    | 420 (34.0)  | 0.020 |
| Less deprived                                | 952 (32.2)   | 436 (30.0)  |       | 708 (30.5)    | 377 (30.5)  |       |
| More deprived                                | 699 (23.6)   | 337 (23.2)  |       | 547 (23.5)    | 288 (23.3)  |       |
| Most deprived                                | 320 (10.8)   | 191 (13.1)  |       | 269 (11.6)    | 151 (12.2)  |       |

Table 5. Characteristics pre- and post-matching, patients age over 75 years.

Model parameters for revision and reoperation in patients aged 60 years and younger – Weibull regression relative hazard

| Explanatory variables           | Coefficient | Standard Deviation |
|---------------------------------|-------------|--------------------|
| ln(shape param.) ln( $\kappa$ ) | 0.0086      | 0.0770             |
| Cons ( $\beta_0$ )              | -3.4911     | 0.8001             |
| Age ( $\beta_1$ )               | -0.0148     | 0.0144             |
| Male ( $\beta_2$ )              | -0.2287     | 0.1755             |
| implant-hemi ( $\beta_3$ )      | 0.7419      | 0.1839             |

Table 6. Model parameters – revision, patients aged 60 years and younger

| Explanatory variables           | Coefficient | Standard Deviation |
|---------------------------------|-------------|--------------------|
| ln(shape param.) ln( $\kappa$ ) | -0.2743     | 0.0884             |
| cons( $\beta_0$ )               | -3.4562     | 0.9107             |
| age( $\beta_1$ )                | -0.0116     | 0.0165             |
| male( $\beta_2$ )               | -0.1812     | 0.1982             |
| implant-hemi( $\beta_3$ )       | 0.7119      | 0.2051             |

Table 7. Model parameters – reoperation, patients aged 60 years and younger

Model parameters for revision and reoperation in patients aged 61-75 – Weibull regression relative hazard

| Explanatory variables           | Coefficient | Standard Deviation |
|---------------------------------|-------------|--------------------|
| ln(shape param.) ln( $\kappa$ ) | -0.0093     | 0.0577             |
| cons( $\beta_0$ )               | -2.3988     | 1.0769             |
| age( $\beta_1$ )                | -0.0364     | 0.0155             |
| male( $\beta_2$ )               | -0.2432     | 0.1406             |
| implant-hemi( $\beta_3$ )       | 0.7705      | 0.1351             |

Table 8. Model parameters – revision, patients aged 61-75 years

| Explanatory variables           | Coefficient | Standard Deviation |
|---------------------------------|-------------|--------------------|
| ln(shape param.) ln( $\kappa$ ) | -0.3712     | 0.0738             |
| cons( $\beta_0$ )               | -1.9527     | 1.3465             |
| age( $\beta_1$ )                | -0.0423     | 0.0194             |
| male( $\beta_2$ )               | 0.0052      | 0.1685             |
| implant-hemi( $\beta_3$ )       | 0.7238      | 0.1732             |

Table 9. Model parameters – reoperation, patients aged 61-75 years

Model parameters for revision and reoperation in patients aged over 75 – Weibull regression relative hazard

| Explanatory variables           | Coefficient | Standard Deviation |
|---------------------------------|-------------|--------------------|
| ln(shape param.) ln( $\kappa$ ) | -0.2516     | 0.1009             |
| cons( $\beta_0$ )               | -2.9861     | 2.8146             |
| age( $\beta_1$ )                | -0.1008     | 0.0354             |
| male( $\beta_2$ )               | 0.0674      | 0.2745             |
| implant-hemi( $\beta_3$ )       | 0.4997      | 0.2294             |

Table 10. Model parameters – revision, patients aged over 75 years

| Explanatory variables           | Coefficient | Standard Deviation |
|---------------------------------|-------------|--------------------|
| ln(shape param.) ln( $\kappa$ ) | -0.4855     | 0.1252             |
| cons( $\beta_0$ )               | -0.7671     | 3.3247             |
| age( $\beta_1$ )                | -0.0595     | 0.0285             |
| male( $\beta_2$ )               | 0.3546      | 0.1524             |
| implant-hemi( $\beta_3$ )       | 0.9318      | 0.2918             |

Table 11. Model parameters – reoperation, patients aged over 75 years

Cost-effectiveness acceptability curve in men

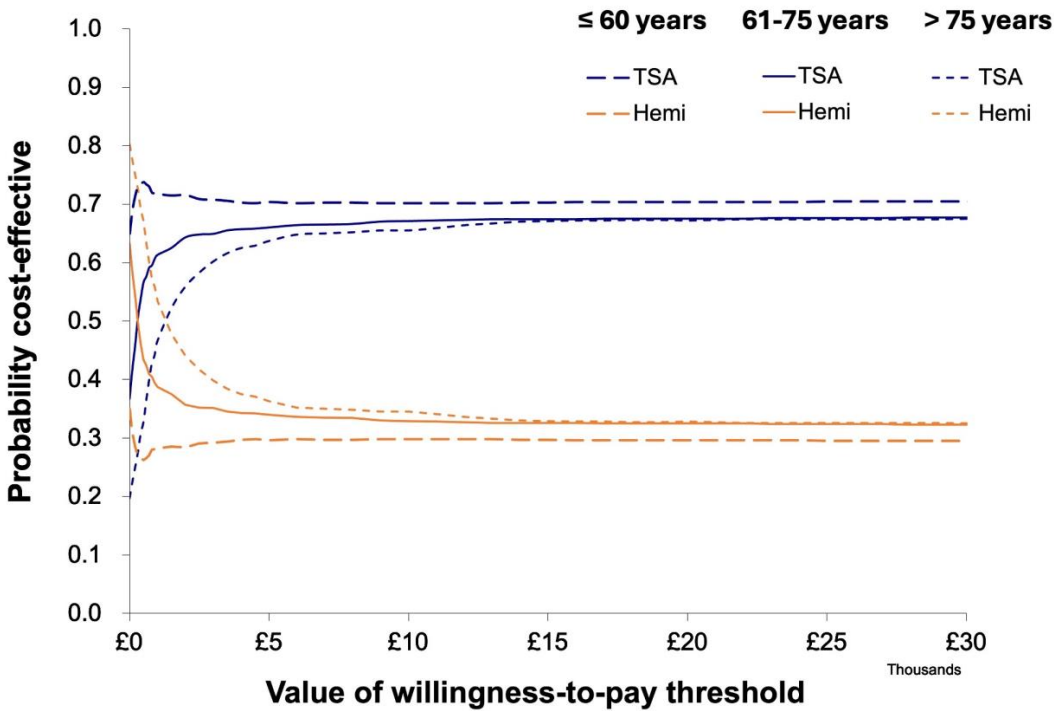

Figure 2. Cost-effectiveness acceptability curve in men.

Cost estimations

Implant costs calculated from the NJR EMBED database

| Implant | Mean cost (£) | Standard deviation (£) |
|---------|---------------|------------------------|
| TSA     | 2306.9        | 381.9                  |
| HA      | 1652.7        | 535.0                  |

Table 12. Implant costs calculated from the NJR EMBED database.

Difference in the duration of operating time for HA and TSA

An estimation of the duration of a TSA was taken from a large healthcare database (2). The mean length of a TSA was 108.30 minutes (SD 35.60 minutes). Assuming a ratio of 1:1.3 for HA:TSA (table 13) the mean duration of a HA was estimated as 83.31 minutes for an overall mean difference of 24.99 minutes. The standard deviation of the duration of a HA was assumed to be the same as a TSA (35.60 minutes).

| Study              | Mean operating time (minutes) |       | Ratio of duration of surgery TSA : HA |
|--------------------|-------------------------------|-------|---------------------------------------|
|                    | TSA                           | HA    |                                       |
| Lo et al (3)       | 157.3                         | 118.4 | 1.33                                  |
| Gartsman et al (4) | 98                            | 63    | 1.56                                  |
| Singh et al (5)    | 163.3                         | 127.7 | 1.28                                  |
|                    | 147.8                         | 121.9 | 1.21                                  |
|                    | 114.4                         | 87.1  | 1.31                                  |

Table 13. Duration of operating time TSA and HA.

|                                       |                    |
|---------------------------------------|--------------------|
| Duration of TSA (SD) from Testa et al | 108.30 min (35.60) |
| Estimated ratio duration HA to TSA    | 1 : 1.3            |
| Estimated duration of HA (SD)         | 83.31 min (24.37)  |
| Difference in mean duration           | 24.99 min          |

The cost of an operating theatre per minute was estimated from values submitted to NHS Scotland (6). After accounting for inflation these were £18.61 per minute. The total cost difference between TSA and HA due to theatre time was £18.61\*24.99 = £465.11.

**Total difference in mean cost**

The total difference in mean cost was the difference in the cost of the implants and the costs of theatre time.

|                                   |          |
|-----------------------------------|----------|
| Implant mean cost difference      | £654.19  |
| Theatre time mean cost difference | £465.11  |
| Total difference                  | £1119.30 |

**Cost of a HA** = reimbursement value - (mean difference / 2) = 6016 – (1119.30/2) = £6575.65

**Cost of a TSA** = reimbursement value + (mean difference / 2) = 6016 + (1119.30/2) = £5456.35

The standard deviation of the total implant cost for TSA and HA was calculated from the combined variance of the costs of the implant and costs of theatre time.

**Overall cost estimations**

| Implant                                | Mean cost (£) | Standard deviation (£) |
|----------------------------------------|---------------|------------------------|
| TSA                                    | 6575.65       | 851.7                  |
| HA                                     | 5456.35       | 764.8                  |
| Revision shoulder (cost code HN86a)    | 8396          | 840                    |
| Re-revision shoulder (cost code HN86a) | 8396          | 840                    |
| Reoperation (cost code HT54B)          | 2510          | 251                    |

Table 14. Overall cost estimations

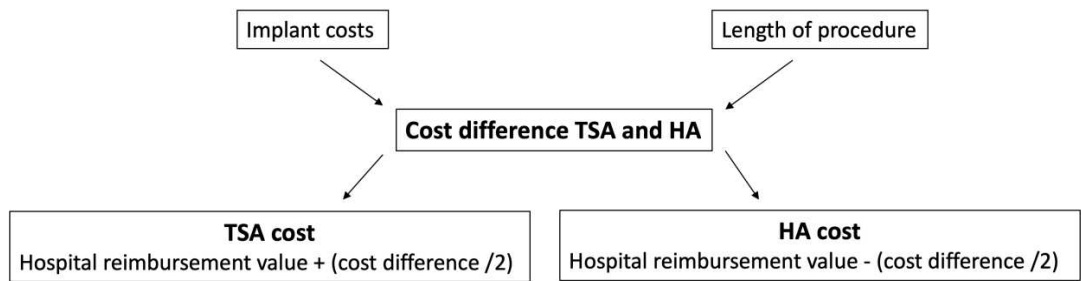

Figure 3. Adjustment of baseline cost, plus additional costs. TSA – total shoulder arthroplasty, HA – Hemiarthroplasty.

## Change in costs and QALYs by age for male patients aged 60 years and younger

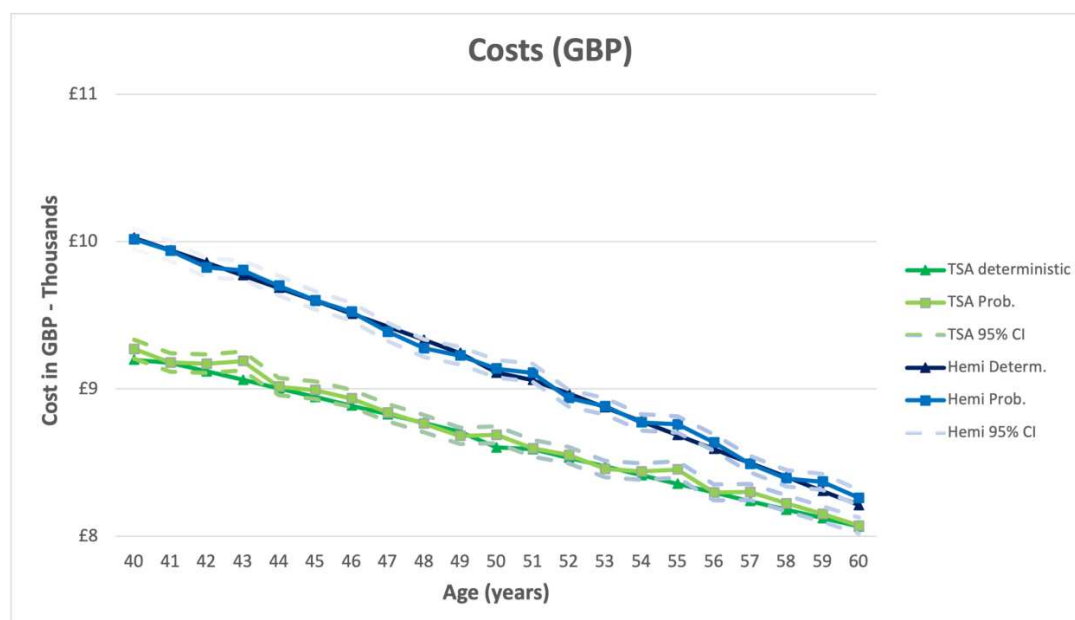

Figure 4. Costs by age for male patients aged 60 years and younger. The same trend was seen in the female cohort.

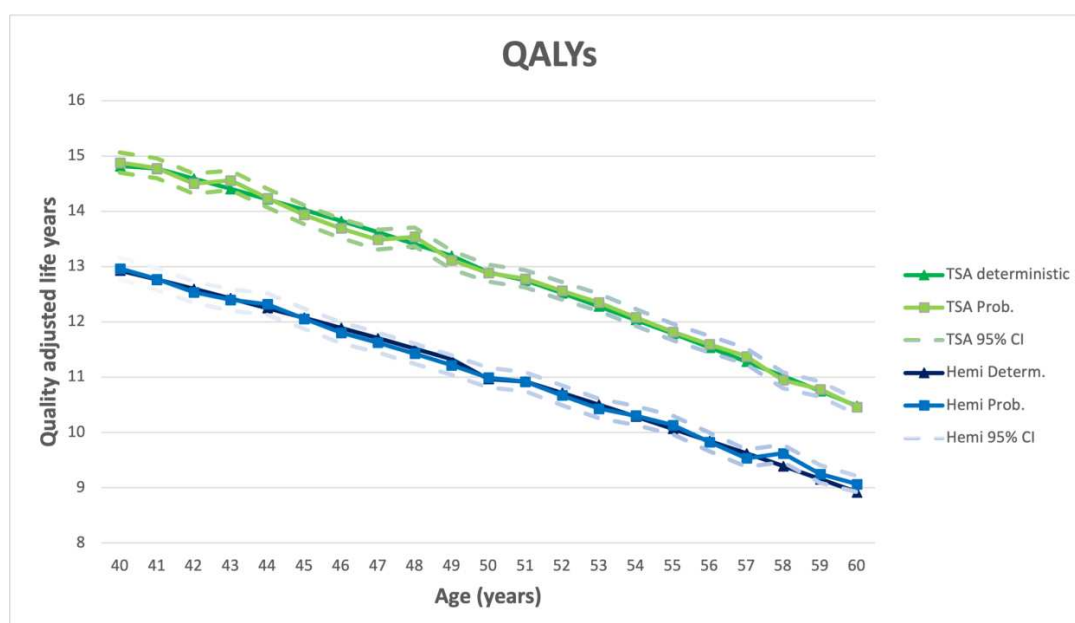

Figure 5. Quality-adjusted life years by age for male patients aged 60 years and younger. The same trend was seen in the female cohort.

CHEERS 2022 Checklist

| Topic                         | No. | Item                                                                                                                            | Location where item is reported          |
|-------------------------------|-----|---------------------------------------------------------------------------------------------------------------------------------|------------------------------------------|
| Title                         |     |                                                                                                                                 |                                          |
|                               | 1   | Identify the study as an economic evaluation and specify the interventions being compared.                                      | Page 1                                   |
| Abstract                      |     |                                                                                                                                 |                                          |
|                               | 2   | Provide a structured summary that highlights context, key methods, results, and alternative analyses.                           | Pages 2&3                                |
| Introduction                  |     |                                                                                                                                 |                                          |
| Background and objectives     | 3   | Give the context for the study, the study question, and its practical relevance for decision making in policy or practice.      | Pages 4&5                                |
| Methods                       |     |                                                                                                                                 |                                          |
| Health economic analysis plan | 4   | Indicate whether a health economic analysis plan was developed and where available.                                             | Submitted to the National Joint Registry |
| Study population              | 5   | Describe characteristics of the study population (such as age range, demographics, socioeconomic, or clinical characteristics). | Page 6                                   |
| Setting and location          | 6   | Provide relevant contextual information that may influence findings.                                                            | Page 6                                   |
| Comparators                   | 7   | Describe the interventions or strategies being compared and why chosen.                                                         | Page 4                                   |
| Perspective                   | 8   | State the perspective(s) adopted by the study and why chosen.                                                                   | Page 6                                   |
| Time horizon                  | 9   | State the time horizon for the study and why appropriate.                                                                       | Page 6                                   |
| Discount rate                 | 10  | Report the discount rate(s) and reason chosen.                                                                                  | Page 10                                  |
| Selection of outcomes         | 11  | Describe what outcomes were used as the measure(s) of benefit(s) and harm(s).                                                   | Pages 7-9                                |
| Measurement of outcomes       | 12  | Describe how outcomes used to capture benefit(s) and harm(s) were measured.                                                     | Pages 7-9                                |
| Valuation of outcomes         | 13  | Describe the population and methods used to measure and value outcomes.                                                         | Pages 7-11                               |

| Topic                                                                        | No. | Item                                                                                                                                                                          | Location where item is reported |
|------------------------------------------------------------------------------|-----|-------------------------------------------------------------------------------------------------------------------------------------------------------------------------------|---------------------------------|
| <b>Measurement and valuation of resources and costs</b>                      | 14  | Describe how costs were valued.                                                                                                                                               | Pages 9&10, appendix            |
| <b>Currency, price date, and conversion</b>                                  | 15  | Report the dates of the estimated resource quantities and unit costs, plus the currency and year of conversion.                                                               | Pages 9&10, appendix            |
| <b>Rationale and description of model</b>                                    | 16  | If modelling is used, describe in detail and why used. Report if the model is publicly available and where it can be accessed.                                                | Pages 6-8, 10&11                |
| <b>Analytics and assumptions</b>                                             | 17  | Describe any methods for analysing or statistically transforming data, any extrapolation methods, and approaches for validating any model used.                               | Pages 7-11                      |
| <b>Characterising heterogeneity</b>                                          | 18  | Describe any methods used for estimating how the results of the study vary for subgroups.                                                                                     | Page 11                         |
| <b>Characterising distributional effects</b>                                 | 19  | Describe how impacts are distributed across different individuals or adjustments made to reflect priority populations.                                                        | Page 11                         |
| <b>Characterising uncertainty</b>                                            | 20  | Describe methods to characterise any sources of uncertainty in the analysis.                                                                                                  | Pages 10&11                     |
| <b>Approach to engagement with patients and others affected by the study</b> | 21  | Describe any approaches to engage patients or service recipients, the general public, communities, or stakeholders (such as clinicians or payers) in the design of the study. | Page 21                         |
| <b>Results</b>                                                               |     |                                                                                                                                                                               |                                 |
| <b>Study parameters</b>                                                      | 22  | Report all analytic inputs (such as values, ranges, references) including uncertainty or distributional assumptions.                                                          | Page 14                         |
| <b>Summary of main results</b>                                               | 23  | Report the mean values for the main categories of costs and outcomes of interest and summarise them in the most appropriate overall measure.                                  | Page 12                         |
| <b>Effect of uncertainty</b>                                                 | 24  | Describe how uncertainty about analytic judgments, inputs, or projections affect findings. Report the effect of choice of discount rate and time horizon, if applicable.      | Pages 12-17                     |
| <b>Effect of engagement with patients and others affected by the study</b>   | 25  | Report on any difference patient/service recipient, general public, community, or stakeholder involvement made to the approach or findings of the study                       | Not reported                    |
| <b>Discussion</b>                                                            |     |                                                                                                                                                                               |                                 |

| Topic                                                                | No. | Item                                                                                                                                       | Location where item is reported |
|----------------------------------------------------------------------|-----|--------------------------------------------------------------------------------------------------------------------------------------------|---------------------------------|
| Study findings, limitations, generalisability, and current knowledge | 26  | Report key findings, limitations, ethical or equity considerations not captured, and how these could affect patients, policy, or practice. | Pages 18-20                     |
| Other relevant information                                           |     |                                                                                                                                            |                                 |
| Source of funding                                                    | 27  | Describe how the study was funded and any role of the funder in the identification, design, conduct, and reporting of the analysis         | Page 21                         |
| Conflicts of interest                                                | 28  | Report authors conflicts of interest according to journal or International Committee of Medical Journal Editors requirements.              | Page 21                         |

From: Husereau D, Drummond M, Augustovski F, et al. Consolidated Health Economic Evaluation Reporting Standards 2022 (CHEERS 2022) Explanation and Elaboration: A Report of the ISPOR CHEERS II Good Practices Task Force. Value Health 2022;25.  
[doi:10.1016/j.jval.2021.10.008](https://doi.org/10.1016/j.jval.2021.10.008)

## References

1. Davies A, Sabharwal S, Liddle AD, Zamora B, Rangan A, Reilly P. The risk of revision and reoperation was lower following total shoulder arthroplasty compared to hemiarthroplasty for osteoarthritis: A matched cohort study of 11,556 patients from the National Joint Registry. *Acta Orthop*. 2024; (Accepted for publication).
2. Testa EJ, Lemme NJ, Li LT, DeFroda S. Trends in operative duration of total shoulder arthroplasty from 2008 to 2018: a national database study. *Shoulder Elbow*. 2022 Oct 1;14(5):534–43.
3. Lo IK, Litchfield RB, Griffin S, Faber K, Patterson SD, Kirkley A. Quality-of-life outcome following hemiarthroplasty or total shoulder arthroplasty in patients with osteoarthritis. A prospective, randomized trial. *J Bone Joint Surg Am*. 2005 Oct;87(10):2178-85. doi: 10.2106/JBJS.D.02198.
4. Gartsman GM, Roddey TS, Hammerman SM. Shoulder arthroplasty with or without resurfacing of the glenoid in patients who have osteoarthritis. *J Bone Joint Surg Am*. 2000 Jan;82(1):26-34. doi: 10.2106/00004623-200001000-00004.
5. Singh A, Yian EH, Dillon MT, Takayanagi M, Burke MF, Navarro RA. The effect of surgeon and hospital volume on shoulder arthroplasty perioperative quality metrics. *J Shoulder Elbow Surg*. 2014;23(8):1187–94.
6. Public health Scotland: Data and intelligence: Theatres. <https://www.isdscotland.org/Health-topics/Finance/Costbook/Speciality-Costs/Theatres.asp> (accessed 17/4/2023)
